## Increased expression of MCPIP1 in HIV-1 controllers is correlated with overexpression of p21

1 Suwellsen S. D. de Azevedo<sup>1\*</sup>, Marcelo Ribeiro-Alves<sup>2</sup>, Fernanda H. Côrtes<sup>1</sup>, Edson Delatorre<sup>3</sup>,  
2 Brenda Hoagland<sup>2</sup>, Beatriz Grinsztejn<sup>2</sup>, Valdilea G. Veloso<sup>2</sup>, Mariza G. Morgado<sup>1</sup>, Thiago  
3 Moreno L. Souza<sup>4,5</sup>, and Gonzalo Bello<sup>1</sup>

4 <sup>1</sup> Laboratório de AIDS & Imunologia Molecular. Instituto Oswaldo Cruz – IOC, FIOCRUZ. Rio de  
5 Janeiro, Brazil.

6 <sup>2</sup> Laboratório de Pesquisa Clínica em DST-AIDS. Instituto Nacional de Infectologia Evandro Chagas  
7 - INI, FIOCRUZ, Rio de Janeiro, Brazil.

8 <sup>3</sup> Laboratório de Genética Molecular de Microrganismos. Instituto Oswaldo Cruz – IOC, FIOCRUZ.  
9 Rio de Janeiro, Brazil.

10 <sup>4</sup> National Institute for Science and Technology on Innovation on Diseases of Neglected Populations  
11 (INCT/IDPN), Center for Technological Development in Health – CDTS, FIOCRUZ, Rio de Janeiro,  
12 Brazil.

13 <sup>5</sup> Laboratório de Imunofarmacologia. Instituto Oswaldo Cruz – IOC, FIOCRUZ. Rio de Janeiro,  
14 Brazil.

15

### 16 \*Correspondence:

17 Suwellsen S.D. de Azevedo

18 [suwellsen@ioc.fiocruz.br](mailto:suwellsen@ioc.fiocruz.br)/[suwellsendias@gmail.com](mailto:suwellsendias@gmail.com)

19 **Keywords: HIV-1 controllers, restriction factors, MCPIP1, p21, immune activation**

20

21 Words count abstract: 343

22 Words count text: 3.442

23 Figures: 3

24 Table: 1

25

26

27

28 **Abstract**

29 Some multifunctional cellular proteins, as the monocyte chemotactic protein-induced protein 1  
30 (MCPIP1) and the cyclin-dependent kinase inhibitor p21, have also shown to be able to modulate the  
31 cellular susceptibility to the human immunodeficiency virus type 1 (HIV-1). Several studies described  
32 that p21 is expressed at high levels *ex vivo* in cells from individuals who naturally control HIV-1  
33 replication (HIC). The expression level of MCPIP1 in HIC was never described before, but a recent  
34 study in a model of renal carcinoma cells showed that MCPIP1 overexpression was associated with an  
35 increase of both p21 transcripts and proteins levels. Here, we explored the potential associations  
36 between MCPIP1 and p21 expression, as well as with cellular activation in HIC, sustaining  
37 undetectable (elite controllers – EC) or low (viremic controllers – VC) viral loads. We found a selective  
38 upregulation of MCPIP1 and p21 mRNA levels in PBMC from HIC compared with both ART–  
39 suppressed and HIV–negative control groups ( $P \leq 0.02$ ) and a strong positive correlation ( $r \geq 0.57$ ;  $P$   
40  $\leq 0.014$ ) between expressions of both transcripts independently of the VL, treatment condition and  
41 HIV status. The mRNA levels of p21, but not of MCPIP1, were positively correlated with activated  
42 CD4<sup>+</sup> T cells levels in HIC and EC ( $r \geq 0.53$ ;  $P \leq 0.017$ ). In relation to the monocyte activation, the  
43 mRNA levels of both p21 ( $r = 0.74$ ;  $P = 0.005$ ) and MCPIP1 ( $r = 0.58$ ;  $P = 0.040$ ) were positively  
44 correlated with plasmatic levels of sCD14 only in EC. Multivariate analysis confirmed the association  
45 between MCPIP1 and p21 mRNA levels, and between the latter with the frequency of activated CD4<sup>+</sup>  
46 T cells. These data show for the first time the simultaneous overexpression and positive correlation of  
47 MCPIP1 and p21 transcripts in the setting of natural suppression of HIV-1 replication *in vivo*. The  
48 positive correlation between MCPIP1 and p21 transcripts supports a common regulatory pathway  
49 connecting these multifunctional host factors and a possible synergistic effect on HIV-1 replication  
50 control. Pharmacological manipulation of these cellular proteins may open novel therapeutic  
51 perspectives to prevent HIV-1 replication and disease progression.

52

## 53 1 Introduction

54 Among the individuals infected by the human immunodeficiency virus type 1 (HIV-1), a rare group  
55 called HIV controllers (HIC) suppress viral replication in absence of antiretroviral therapy, maintaining  
56 RNA viral loads (VL) below the limit of detection (LOD) (elite controllers, EC) or at low levels (>  
57 LOD and < 2,000 copies/ml; viremic controllers, VC). Natural control of HIV-1 replication is probably  
58 a multifactorial feature that involves different combinations of host and/or viral factors (1).

59 Some intrinsic host proteins, termed restriction factors (RF), are components of the innate immune  
60 response (2,3) that have the ability to cause a significant reduction in viral infectivity by interacting  
61 directly with the pathogen and are generally induced by interferon (IFN), hence being known as IFN-  
62 stimulated genes (ISGs) (4). Several RF has been shown to limit HIV replication *in vitro* at different  
63 stages of its life cycle (3), including some classical RF such the Apolipoprotein B mRNA-Editing  
64 enzyme, Catalytic polypeptide-like (APOBEC3G), the Bone Stromal Tumor protein 2  
65 (BST2)/Tetherin, and the Sterile Alpha Motif domain and HD domain-containing protein 1 (SAMHD1)  
66 (2), and others more recently characterized like the Myxovirus resistance protein 2 (Mx2), the  
67 Interferon-inducible transmembrane family proteins (IFITM1-3 members) and Schlafen 11 (SLFN11)  
68 (3). The mRNA levels of some RF including SAMHD1, Theterin, IFITM1, Mx2 and SLFN11 have  
69 been described to be elevated in peripheral blood mononuclear cells (PBMC) or CD4<sup>+</sup> T cells of HIC  
70 compared to antiretroviral (ART)-suppressed and/or HIV-uninfected individuals (5–9), although with  
71 contrasting findings across different HIC cohorts.

72 Others host multifunctional proteins, not recognized as classical RF, are also able to modulate the  
73 cellular susceptibility to HIV-1 infection. The cyclin-dependent kinase (CDK) inhibitor p21, encoded  
74 by the CDKN1A gene, modulates multiple relevant processes of the immune system, including  
75 proliferation of activated/memory T cells, macrophage activation and inflammation (10–17). This  
76 protein also indirectly limits the HIV-1 replication *in vitro* in various cellular systems by blocking the  
77 biosynthesis of dNTPs required for viral reverse transcription and by inhibiting the CDK9 activity  
78 required for HIV-1 mRNA transcription (18–23). Several studies described that p21 is expressed at  
79 high levels *ex vivo* in CD4<sup>+</sup> T cells from HICs (21,24–26) and that p21 mRNA levels correlated with  
80 CD4<sup>+</sup> T cell activation in EC, but not in other HIV-infected groups (5). These evidences suggest that  
81 the inducibility of p21 to immune activation is a singular characteristic of EC and may contribute to  
82 the natural control of HIV-1 replication *in vivo*.

83 The monocyte chemotactic protein-induced protein 1 (MCPIP1), encoded by ZC3H12A gene, is  
84 another newly discovered host multifunctional modulator of immune response with antiviral activity  
85 (27). MCPIP1 plays a critical role in the regulation of the inflammatory response and immune  
86 homeostasis and also blocks HIV-1 replication *in vitro* by promoting the viral mRNA degradation  
87 through its RNase activity, particularly in quiescent CD4<sup>+</sup> T cells (27,28). In activated CD4<sup>+</sup> T cells,  
88 MCPIP1 is rapidly degraded (28) after its cleavage by the mucosa-associated lymphoid-tissue  
89 lymphoma-translocation 1 (MALT1) protein (29,30). In activated macrophage cells, by contrast,  
90 MCPIP1 transcripts are induced by TLR ligands and pro-inflammatory cytokines (mainly, TNF- $\alpha$ , IL-  
91 1 $\beta$  and CCL2/MCP-1), and its expression stimulate a negative feedback loop that attenuates the  
92 inflammatory state by decreasing its fundamental mediators (27,31).

93 The expression level of MCPIP1 in HIC was never described before. Interestingly, a recent study in  
94 renal carcinoma cells (Caki-1 cells) revealed that MCPIP1 overexpression reduces the cellular growth  
95 by increasing the levels of p21 transcripts, along with other proteins involved in cell cycle  
96 progression/arrest, supporting a coordinate regulation of MCPIP1 and p21 transcripts in that cell-line

97 (32). This evidence prompted us to ask whether the expression of MCPIP1 could be elevated and  
98 positively correlated with p21 in the setting of natural control of HIV-1 infection. To test this  
99 hypothesis, we quantified the *in vivo* expression of MCPIP1, p21 and several antiviral host RF mRNAs  
100 in PBMC from HIC, ART-suppressed and HIV-uninfected individuals. We further explored the  
101 potential relationship between MCPIP1/p21 expression and levels of systemic cellular activation in  
102 HIC.

## 103 2 Methods

### 104 2.1 Study Subjects

105 We analyzed a cohort of 21 HIC subjects followed-up at the Instituto Nacional de Infectologia Evandro  
106 Chagas (INI) in Rio de Janeiro, Brazil. All HIC maintained RNA VL of < 2,000 copies/ml without  
107 antiretroviral therapy for at least five years and were subdivided in two sub-groups: EC ( $n = 13$ ) when  
108 most ( $\geq 70\%$ ) plasma VL determinations were below the limit of detection (LOD), and VC ( $n = 8$ )  
109 when most ( $\geq 70\%$ ) VL determinations were > LOD and < 2,000 copies/ml. The limit of detection of  
110 plasma VL determinations varied over the follow-up period in according to the Brazilian Ministry of  
111 Health guidelines, with methodologies being updated overtime to improve sensitivity: Nuclisens HIV-  
112 1 RNA QT assay (Organon Teknika, Durham, NC, limit of detection: 80 copies/mL) from 1999 to  
113 2007; the Versant HIV-1 3.0 RNA assay (bDNA 3.0, Siemens, Tarrytown, NY, limit of detection: 50  
114 copies/mL) from 2007 to 2013; and the Abbott RealTime HIV-1 assay (Abbott Laboratories,  
115 Wiesbaden, Germany, limit of detection: 40 copies/mL) from 2013 to until today. Virological and  
116 immunological characteristics of these subjects were described in detail in previous studies (33,34).  
117 Two groups of ART-suppressed subjects (ART,  $n = 8$ ) and healthy HIV-1-uninfected subjects (NEG,  
118  $n = 10$ ) were used as controls.

### 119 2.2 mRNA gene-expression analysis

120 Total RNA was extracted from  $1 \times 10^7$  PBMC using RNeasy mini kit (Qiagen, Hilden, North Rhine-  
121 Westphalia, Germany) in which buffer RLT was supplemented with  $\beta$ -mercaptoethanol and displaced  
122 on-column DNase treatment using a Qiagen RNase-Free DNase Set (Qiagen, Hilden, North Rhine-  
123 Westphalia, Germany) according to manufacturer's instruction. Total RNA yield and quality were  
124 determined using NanoDrop<sup>®</sup> 8000 spectrophotometer and an Agilent<sup>®</sup> 2100 Bioanalyzer. Only  
125 samples with an RNA integrity number (RIN) greater than 8.0 were used. Purified RNA (1  $\mu$ g) was  
126 reverse-transcribed to cDNA using RT<sup>2</sup> First Strand Kit (Qiagen, Hilden, North Rhine-Westphalia,  
127 Germany). The cDNA was mixed with RT<sup>2</sup>SYBR Green/ROX qPCR Master Mix (Qiagen, Hilden,  
128 North Rhine-Westphalia, Germany) and the mixture was added into customized RT<sup>2</sup>RNA PCR Array  
129 (Qiagen, Hilden, North Rhine-Westphalia, Germany) to measure the mRNA expression of 10 cellular  
130 target genes (APOBEC3G, SAMHD1, Tetherin, Mx1, Mx2, SLFN11, IFITM1, IFITM3, MCPIP1, and  
131 p21) besides three housekeeping genes (GAPDH,  $\beta$ -actin, and RNase-P), according to manufacturer's  
132 instructions. Values of the crossing point at the maximum of the second derivative of the four-  
133 parameters fitted sigmoid curve second derivative, Cp, was determined for each sample. The efficiency  
134 of each amplification reaction was calculated as the ratio between the fluorescence of the cycle of  
135 quantification and fluorescence of the cycle immediately preceding that. Genes used in the  
136 normalization among samples were selected by the geNorm method (35). Data were expressed as fold-  
137 changes in mRNA abundance calculated as the normalized gene expression in any test sample divided  
138 by the mean normalized gene expression in the control HIV-negative group.

### 139 2.3 T cell and monocyte activation analyses

140 We used data of T cell and monocyte activation obtained in a previous study conducted by our group  
141 including these patients (34), in which plasma levels of soluble CD14 (sCD14) were determined by  
142 ELISA-sCD14 Quantikine assay (R&D Systems Minneapolis, MN) according to the manufacturer's  
143 protocol and surface expression of combined HLA-DR and CD38 on CD4<sup>+</sup> and CD8<sup>+</sup> T cells was  
144 analyzed by flow cytometry.

## 145 **2.4 Data analyses**

146 The comparisons of mean log-fold changes in mRNA abundance were performed by either t-tests or  
147 one-way ANOVA nonparametric permutation tests (B = 1,000 permutations), followed by pair-wise  
148 comparisons with Holm-Bonferroni adjustment (36), for two or more groups respectively. Spearman  
149 coefficient was used for correlation analyses. A first-order log-Normal multiple regression analysis  
150 was fitted to model p21 gene expression as a function of MCPIP1 gene expression, CD4<sup>+</sup> T cell  
151 activation (HLA-DR<sup>+</sup>CD38<sup>+</sup>), and HIC groups (EC and VC). The threshold for statistical significance  
152 was set to  $P < 0.05$ . Data were analyzed with R software (version 3.5.2) (37).

153

## 154 **3 Results**

155 Twenty-nine HIV-1 positive (21 HIC and 8 ART-suppressed) and 10 HIV-negative individuals were  
156 included in this cross-sectional study. Most HIV-positive (59%) and HIV-negative (60%) individuals  
157 were females and all individuals displayed CD4<sup>+</sup> T cells counts above 500 cells/ $\mu$ l (Table 1). Although  
158 the EC subgroup shows a higher proportion of females (77%), the difference was not significant  
159 (Supplementary Table 1).

160 Analysis of the expression of multifunctional genes revealed a significant upregulation of both  
161 MCPIP1 and p21 transcripts in PBMC from HIC (Figure 1). The MCPIP1 mRNA was upregulated in  
162 PBMC from HIC compared to cells from both ART-suppressed (1.68-fold increase;  $P = 0.003$ ) and  
163 HIV-negative (1.37-fold increase;  $P = 0.02$ ) individuals (Figure 1A). A similar overexpression of the  
164 p21 mRNA was observed in PBMC from HIC compared to ART-suppressed (1.63-fold increase;  $P =$   
165  $0.003$ ) and HIV-negative (1.55-fold increase;  $P = 0.003$ ) individuals (Figure 1B). In contrast, we found  
166 no significant differences in the mRNA levels of antiretroviral RF between the HIC and control groups,  
167 with the only exception of IFITM1 that was significantly elevated (1.15-fold increase;  $P = 0.03$ ) in HIC  
168 in comparison to the HIV-negative group (Supplementary Figure S1).

169 We observed a significant positive correlation between the mRNA expression of MCPIP1 and p21 ( $r$   
170  $\geq 0.57$ ;  $P \leq 0.014$ ) in our cohort independently of the VL, treatment condition and HIV status (Figure  
171 2). This positive correlation was maintained when individuals were subdivided by sex (Supplementary  
172 Figure S2). No significant correlations were observed between the mRNA expression of  
173 multifunctional genes MCPIP1/p21 and RF, with the only exception of a significant, negative  
174 correlation between MCPIP1/p21 and APOBEC3G in HIC (Supplementary Figure S3) and EC  
175 (Supplementary Figure S4).

176 To explore the potential relationship of p21 or MCPIP1 expression with immune activation, we  
177 measured the frequency of phenotype HLA-DR<sup>+</sup>CD38<sup>+</sup> on CD4<sup>+</sup> and CD8<sup>+</sup> T cells (T cell activation)  
178 and plasma levels of sCD14 (monocyte activation) in our cohort. Frequencies of activated CD4<sup>+</sup> T cell  
179 populations in VC and ART-suppressed subjects were higher than in EC ( $P < 0.0001$ ) and HIV-  
180 negative ( $P = 0.0002$ ) individuals (Supplementary Figure S5A). The VC subgroup also had  
181 significantly higher frequencies of activated CD8<sup>+</sup> T cell than EC ( $P = 0.0007$ ) and control groups ( $P$   
182  $\leq 0.0009$ ) (Supplementary Figure S5B). The median concentration of sCD14 in plasma was not  
183 significantly different across the groups (Supplementary Figure S5C). No significant correlations  
184 between mRNA levels of MCPIP1 and CD4<sup>+</sup> T cell (Figure 3A) or CD8<sup>+</sup> T cell (data not shown)



185 activation were observed for HIC or EC subsets. The mRNA levels of p21 were positively associated  
186 with activated CD4<sup>+</sup> T cells levels in HIC ( $r = 0.53$ ;  $P = 0.016$ ) and EC ( $r = 0.68$ ;  $P = 0.017$ ) (Figure  
187 3B); but not with activated CD8<sup>+</sup> T cell levels (data not shown). Levels of sCD14 were positively  
188 correlated with both MCPIP1 ( $r = 0.58$ ;  $P = 0.04$ ) and p21 ( $r = 0.74$ ;  $P = 0.005$ ) mRNA levels only in  
189 the EC subset (Figure 3C and D). No significant correlations between mRNA levels of MCPIP1/p21  
190 and CD4<sup>+</sup>/CD8<sup>+</sup> T cell activation or sCD14 levels were observed when ART-suppressed and HIV-  
191 negative individuals were included (Supplementary Figures S6). Multivariate analysis showed that the  
192 upregulation of MCPIP1 was positively associated with the increase of p21 expression in HIC (1.44-  
193 fold increase;  $P = 0.0035$ ) (Supplementary Figure S7A). The frequency of activated CD4<sup>+</sup> T cells also  
194 was positively associated with the increase of p21 expression in both EC and VC (1.48-fold increase;  
195  $P = 0.0116$ ), although this increase of the p21 expression was down-regulated by the increase of  
196 activated CD4<sup>+</sup> T cells in VC when compared to EC (1.30-fold decrease by an increase of 1%  
197 CD4<sup>+</sup>HLA-DR<sup>+</sup>CD38<sup>+</sup> T cells;  $P = 0.0284$ ) (Supplementary Figure S7B). Overall, the model was  
198 highly significant ( $P = 0.003$ ) and could explain as much as 70% ( $R^2 = 0.492$ ) of p21 expression.

#### 199 **4 Discussion**

200 In this study, we observed that MCPIP1 and p21 mRNA expression were significantly increased in  
201 PBMC of HIC compared to cells of HIV-negative and -positive/ART-suppressed individuals. While  
202 elevated expression of p21 in PBMC of HIC had already been previously described (5,21,24–26), this  
203 is the first study to show overexpression of MCPIP1 alongside with p21 in these individuals.

204 The mRNA levels of MCPIP1 and p21 were positively correlated in HIC as well as in HIV–positive  
205 and –negative individuals. This supports a coordinated expression of these cellular genes in different  
206 settings, consistent with what has been shown for a renal carcinoma cell line (32). According to this  
207 study, MCPIP1 expression triggers the activation of p21 by two mechanisms: 1) down-modulation of  
208 damage-specific DNA binding protein 1 (DDB1) which regulates degradation of p21; and 2)  
209 upregulation of the mRNA levels of chromatin licensing and DNA replication factor 1 (CDT1) which  
210 activates p21 (32). In addition, following HIV-1 infection, the cellular let-7c miRNA is upregulated  
211 and it downregulate p21, resulting in higher copy number of viral genome transcripts in infected cells  
212 (38). MCPIP1 acts as a broad suppressor of the biogenesis pathway of both cellular (39) and viral  
213 miRNA (40). The involvement of the MCPIP1 in the degradation of another precursor of let-7 family  
214 (pre-let-7g) was already described (41), reinforcing the hypothesis that MCPIP1 might enhance the  
215 antiviral responses triggered by HIV-1 entry and infection by downregulating the miRNAs that target  
216 p21.

217 Increased expression of some host RF, which are also ISGs (4), has been previously observed in CD4<sup>+</sup>  
218 T cells (i.e., SAMHD1, SLFN11 and IFITM1) (5,7,8) and PBMC (i.e., Mx1, Mx2, Tetherin and  
219 SLFN11) from HIC (6,9). With the only exception of IFITM1, no other RF analyzed here were  
220 upregulated in PBMC from our HIC cohort. In the chronic phase of HIV–1 infection in viremic  
221 untreated patients, most ISGs are upregulated in CD4<sup>+</sup> T cells (42–44) and their expression is positively  
222 correlated with the percentage of activated T cells and negatively correlated with CD4<sup>+</sup> T cell counts  
223 (42–46). This suggests that residual or low-level viremia observed in our HIC might not be enough to  
224 induce a generalized upregulation of ISGs during chronic infection (44). In addition, MCPIP1 (47,48)  
225 and p21 (16) negatively regulate the NF- $\kappa$ B cascade and their overexpression may also contribute to  
226 limit the chronic overexpression of ISGs in HIC. While most RF are mainly induced by IFN type I,  
227 IFITM1 can also be induced by IFN type II (49), indicating that another pathway may have stimulated  
228 its expression in our HIC cohort.

229 Although we have failed to detect an overall up-regulation of host RF in our HIC cohort, it is interesting  
230 to note that a few individuals displayed mRNA levels of SAMHD1 and/or SLFN11 well above the  
231 normal range (Supplementary Figure S1). These observations suggest that there might not be a unique  
232 host RF expression signature common to all HIC, but that different combinations of host RF could be  
233 associated with natural control of HIV-1 replication in distinct individuals. Thus, the particular set of  
234 increased host RF may vary across different HIC cohorts and this might explain the apparently  
235 contrasting findings across studies (5–9,50). Additionally, even though we were able to identify  
236 statistically significant differences in expression levels of MCPIP1 and p21 in PBMC between HIC  
237 and control groups, these findings warrant validation using larger cohorts.

238 Our results confirm previous observations that levels of p21 mRNA are positively correlated with CD4<sup>+</sup>  
239 T cell activation in EC and HIC groups (5) and further support a positive correlation with sCD14, a  
240 marker of monocyte activation, in EC. These correlations are fully consistent with the critical role of  
241 p21 as a negative regulator of the proliferation of activated/memory T cells (10,13,14) and of  
242 macrophage-mediated inflammatory responses (15–17). Although MCPIP1 expression is also essential  
243 for suppressing peripheral T cell (51) and macrophage (52,53) activation, we only found a positive  
244 correlation of MCPIP1 mRNA with sCD14 in EC. While induction of MCPIP1 mRNA *in vitro* in  
245 response to TLR as well as IL-1 $\beta$  stimulation in macrophages is rapid and long-lasting ( $\geq$  24h) (52–  
246 54), the corresponding induction upon T cell receptor stimulation in CD4<sup>+</sup> T cell is more ephemeral (<  
247 12 hours) (55), which could have hindered the observation of a direct correlation between these two  
248 parameters. Notably, increased expression of MCPIP1/p21 associated with T cell and/or monocyte  
249 activation seems to be a unique characteristic of HIC/EC, because similar correlations were not  
250 observed in our study for other HIV-infected or HIV-negative subjects and previous studies have  
251 shown that viremic progressors display reduced levels of p21 even though exhibit high levels of cellular  
252 activation and inflammation (21). These results suggest that MCPIP1/p21 overexpression may be a  
253 distinctive homeostatic innate response of HIC to limit the deleterious effects of aberrant chronic  
254 immune activation and inflammation driven by HIV-1 infection.

255 Transcript levels of RF here analyzed were not significantly correlated with T cell activation or sCD14,  
256 with the only exception of a negative correlation between APOBEC3G mRNA and sCD14 levels in  
257 EC ( $r = -0.73$ .  $P = 0.006$ ; data not shown). Surprisingly, transcripts levels of APOBEC3G were also  
258 negatively correlated with MCPIP1 and p21 mRNA levels in both HIC and EC. One possible  
259 explanation for these negative correlations lies in the interaction of APOBEC3G, MCPIP1, and p21  
260 with the product of an important monocyte differentiation gene, the Kruppel-like factor 4 (KLF4). The  
261 expression of KLF4 in human macrophages is induced after IFN- $\gamma$ , LPS, or TNF- $\alpha$  stimulus (56),  
262 mediating the proinflammatory signaling and the direct transcriptional regulation of CD14 *in vitro* (57).  
263 Interestingly, KLF4 is also able to induce expression of both MCPIP1 (58) and p21 (59,60), whereas  
264 APOBEC3G binds to the 3'-UTR of KLF4 mRNA and results in the reduction of its expression (61).  
265 Thus, lower levels of APOBEC3G mRNA may be associated with an upregulation of KLF4 that in  
266 turn induce higher levels of sCD14 and MCPIP1/p21 mRNA.

267 Selective upregulation of MCPIP1 and p21 in CD4<sup>+</sup> T, macrophages and/or dendritic cells may directly  
268 limit HIV-1 replication by 1) reducing the reverse transcription and chromosomal integration of HIV-  
269 1 in quiescent cells and thus limiting the size of the latent proviral reservoir (18–20,62–64); 2)  
270 restricting HIV-1 LTR transcription (47,48,65,66); and, 3) degrading viral mRNA and miRNA  
271 (28,39,40,67). Upregulation of p21 and MCPIP1 may also indirectly limit HIV-1 replication and  
272 further prevent CD4<sup>+</sup> T cells loss by reducing chronic IFN-I signaling, generalized inflammation and  
273 over-activation of the immune system (10,14–17,52,53,68–70), without affecting the activation of  
274 antiviral cellular responses. Although the enhanced antiviral and anti-inflammatory state may not be

275 enough to fully restrict HIV-1 replication (71), it could act in concert with other innate and adaptive  
276 immune mechanisms to control HIV replication in HIC.

277 The enhanced expression of a few select host genes, including p21, was strongly associated with  
278 reduced CD4<sup>+</sup> T cell-associated HIV RNA during ART, indicating that the p21 may contribute to the  
279 control of viral expression and ongoing replication during ART (72). Another study demonstrates that  
280 atorvastatin, a lipid-lowering medication, exert a broad spectrum of anti-inflammatory functions and  
281 further reduced HIV infection in both rested and activated CD4<sup>+</sup> T cells *in vitro* via p21 upregulation  
282 (22). Interestingly, atorvastatin was found to up-regulates p21 through a p53 independent pathway,  
283 which is consistent with a potential role of MCPIP1 in that antiviral mechanism. These observations  
284 suggest that pharmacological manipulation of p21 and MCPIP1 may open novel therapeutic  
285 perspectives to prevent HIV-1 replication and to attenuate HIV-associated inflammation and immune  
286 activation during ART.

287 An important limitation of our study is the impossibility of assigning which cell(s) population(s) has  
288 increased expression of p21 and MCPIP1 in HIC. The expression profile of many RF and ISGs may  
289 be different between CD4<sup>+</sup> T cells and monocytes (8), suggesting that the individualization of these  
290 cell types might better decipher the mechanisms of host factors regulation in the setting of natural  
291 control of HIV-1 infection. Another potential limitation is that only mRNA levels were analyzed.  
292 Previous studies showed that p21 mRNA levels mirror p21 protein levels in CD4<sup>+</sup> T cells from HIC  
293 (21) and that MCPIP1 mRNA levels reflect MCPIP1 protein levels in HCV-infected hepatoma cells  
294 (73). Although this evidence indicates a close match between transcripts and protein expression levels,  
295 measuring the levels/activity of p21 and MCPIP1 proteins in cells from HIC should also help to  
296 elucidate the relevance of these RF for HIV control.

297 In summary, our data confirm the high levels of p21 mRNA expression and shows for the first-time  
298 the concurrent overexpression of MCPIP1 mRNA in HIC. Moreover, we found a positive correlation  
299 between p21 and MCPIP1 transcripts in HIC, indicating a possible synergistic effect of both innate  
300 host RF on natural suppression of HIV-1 replication *in vivo*. Further studies are needed to better  
301 understand the role of p21 and MCPIP1 in the natural control of HIV-1 replication and disease  
302 progression in HIC. These findings may also have important implications for the development of new  
303 immune-based therapeutic strategies for a functional cure of HIV-1 infection.

304

305



## 306 5 Figure legends

307 **Figure 1. MCPIP1 and p21 mRNA levels are upregulated in PBMC from HIC.** Boxplots represent  
308 the interquartile and sample median (central solid black line) of the relative changes (fold-change  
309 values relative to the mean of HIV-1-uninfected (NEG) subjects) of MCPIP1 (A) and p21 (B)  
310 expression comparing NEG and ART-suppressed subjects (ART) with HIV controllers (HIC). P-values  
311 < 0.05 were considered statistically significant.

312 **Figure 2. p21 and MCPIP1 mRNA levels in PBMC from HIC are positively correlated.** The p21  
313 and MCPIP1 normalized expression correlations were calculated considering all groups (A), HIV-  
314 infected (B), HIC (C), and EC (D). The points' colors indicate the patient group, accordingly to the  
315 legend. Correlation coefficients (Spearman's  $\rho$ ) are shown in the upper right corner of each graph. P-  
316 values < 0.05 were considered statistically significant.

317 **Figure 3. p21 transcripts are positively correlated with CD4<sup>+</sup> T cell and monocyte activation**  
318 **while MCPIP1 transcripts are positively correlated only with monocyte activation in EC.** The  
319 correlations were made evaluating the relationship between activated CD4<sup>+</sup> T cells (A and B) or sCD14  
320 levels (C and D) with the normalized expression of p21 and MCPIP1 for EC and HIC groups. The  
321 points' colors present in each graph indicate the groups present according to the legend. Correlations  
322 coefficient (Spearman's  $\rho$ ) are shown in the upper left corner of each graph.

## 323 6 Ethics Statement

324 This study was carried out in accordance with the recommendations of the ethical committee of  
325 Instituto Nacional de Infectologia Evandro Chagas (INI-Fiocruz) that approved the study protocol  
326 (CAAE 1717.0.000.009-07). All subjects gave written informed consent in accordance with the  
327 Declaration of Helsinki.

## 328 7 Conflict of Interest

329 The authors declare that the research was conducted in the absence of any commercial or financial  
330 relationships that could be construed as a potential conflict of interest.

## 331 8 Author Contributions

332 GB and TMLS conceived and designed the study and supervised the experiments. SSDA conducted  
333 experiments and analyzed the data together with MR-A and GB. FH performed the CD4<sup>+</sup> T cell and  
334 monocyte activation assays. ED collaborated with mRNA gene-expression analysis. BH, BG, and  
335 VGV conducted patient recruitment and follow-up. FH, ED and MGM provided intellectual input for  
336 results interpretations. SSDA, GB and MR-A wrote the first draft and all authors assisted with the  
337 writing and approved the final manuscript.

## 338 9 Acknowledgments

339 The authors thank the patients, who participated in the study, as well as all the technical staff involved  
340 in the clinical follow-up of these patients. We also thank Ms Marilia Alves Figueira de Melo for the  
341 excellent technical support in RNA quantification and integrity analyses and the Plataforma de PCR  
342 em Tempo Real – RJ (RPT09A) – FIOCRUZ and Plataforma de Sequenciamento de Ácidos Nucléicos  
343 de Nova Geração – RJ (RPT01J) – FIOCRUZ.

344 **10 Funding**

345 This work was supported by the Fundação de Amparo à Pesquisa do Estado do Rio de Janeiro –  
346 FAPERJ (grant number E-26/110.123/2014) and the Conselho Nacional de Desenvolvimento  
347 Científico e Tecnológico – CNPq (Grant Number 401220/2016-8). SSDA was supported by funding  
348 from Conselho Nacional de Desenvolvimento Científico e Tecnológico (CNPq) and Fundação de  
349 Amparo à Pesquisa do Estado do Rio de Janeiro – FAPERJ. ED was financed by a Postdoctoral  
350 fellowship from the “Programa Nacional de Pós-Doutorado (PNPD)” by the Coordenação de  
351 Aperfeiçoamento de Pessoal de Nível Superior - Brasil (CAPES) - Finance Code 001.

352 **11 References**

- 353 1. Walker BD, Yu XG. Unravelling the mechanisms of durable control of HIV-1. *Nat Rev*  
354 *Immunol* (2013) **13**:487–498. doi:10.1038/nri3478
- 355 2. Harris RS, Hultquist JF, Evans DT. The Restriction Factors of Human Immunodeficiency  
356 Virus. *J Biol Chem* (2012) **287**:40875–40883. doi:10.1074/jbc.R112.416925
- 357 3. Colomer-Lluch M, Ruiz A, Moris A, Prado JG. Restriction Factors: From Intrinsic Viral  
358 Restriction to Shaping Cellular Immunity Against HIV-1. *Front Immunol* (2018) **9**:2876.  
359 doi:10.3389/fimmu.2018.02876
- 360 4. Doyle T, Goujon C, Malim MH. HIV-1 and interferons: who’s interfering with whom? *Nat*  
361 *Rev Microbiol* (2015) **13**:403–413. doi:10.1038/nrmicro3449
- 362 5. Abdel-Mohsen M, Raposo RAS, Deng X, Li M, Liegler T, Sinclair E, Salama MS, Ghanem  
363 HEA, Hoh R, Wong JK, et al. Expression profile of host restriction factors in HIV-1 elite  
364 controllers. *Retrovirology* (2013) **10**:1–13. doi:10.1186/1742-4690-10-106
- 365 6. Krishnan S, Wilson EMP, Sheikh V, Rupert A, Mendoza D, Yang J, Lempicki R, Migueles  
366 SA, Sereti I. Evidence for innate immune system activation in HIV type 1-infected elite  
367 controllers. *J Infect Dis* (2014) **209**:931–939. doi:10.1093/infdis/jit581
- 368 7. Riveira-Muñoz E, Ruiz A, Pauls E, Permanyer M, Badia R, Mothe B, Crespo M, Clotet B,  
369 Brander C, Ballana E, et al. Increased expression of SAMHD1 in a subset of HIV-1 elite  
370 controllers. *J Antimicrob Chemother* (2014) **69**:3057–3060. doi:10.1093/jac/dku276
- 371 8. Canoui E, Noël N, Lécuroux C, Boufassa F, Sáez-Ciri3n A, Bourgeois C, Lambotte O, ANRS  
372 CO21 CODEX Study Group. Strong ifitm1 Expression in CD4 T Cells in HIV Controllers Is  
373 Correlated With Immune Activation. *J Acquir Immune Defic Syndr* (2017) **74**:e56–e59.  
374 doi:10.1097/QAI.0000000000001166
- 375 9. Van Hecke C, Trypsteen W, Malatinkova E, De Spiegelaere W, Vervisch K, Rutsaert S,  
376 Kinloch-de Loes S, Sips M, Vandekerckhove L. Early treated HIV-1 positive individuals  
377 demonstrate similar restriction factor expression profile as long-term non-progressors.  
378 *EBioMedicine* (2019)1–12. doi:10.1016/j.ebiom.2019.02.006
- 379 10. Khanna AK, Plummer M, Nilakantan V, Pieper GM. Recombinant p21 Protein Inhibits  
380 Lymphocyte Proliferation and Transcription Factors. *J Immunol* (2005) **174**:7610–7617.  
381 doi:10.4049/jimmunol.174.12.7610

- 382 11. Khanna AK. Reciprocal role of cyclins and cyclin kinase inhibitor p21WAF1/CIP1 on  
383 lymphocyte proliferation, allo-immune activation and inflammation. *BMC Immunol* (2005)  
384 **6**:22. doi:10.1186/1471-2172-6-22
- 385 12. Balomenos D, Martín-Caballero J, García MI, Prieto I, Flores JM, Serrano M, Martínez-A C.  
386 The cell cycle inhibitor p21 controls T-cell proliferation and sex-linked lupus development.  
387 *Nat Med* (2000) **6**:171–6. doi:10.1038/72272
- 388 13. Arias CF, Ballesteros-Tato A, Garcia MI, Martin-Caballero J, Flores JM, Martinez-A C,  
389 Balomenos D. p21CIP1/WAF1 Controls Proliferation of Activated/Memory T Cells and  
390 Affects Homeostasis and Memory T Cell Responses. *J Immunol* (2007) **178**:2296–2306.  
391 doi:10.4049/jimmunol.178.4.2296
- 392 14. Santiago-Raber M-L, Lawson BR, Dummer W, Barnhouse M, Koundouris S, Wilson CB,  
393 Kono DH, Theofilopoulos AN. Role of Cyclin Kinase Inhibitor p21 in Systemic  
394 Autoimmunity. *J Immunol* (2001) **167**:4067–4074. doi:10.4049/jimmunol.167.7.4067
- 395 15. Lloberas J, Celada A. p21 waf1/CIP1 , a CDK inhibitor and a negative feedback system that  
396 controls macrophage activation. *Eur J Immunol* (2009) **39**:691–694.  
397 doi:10.1002/eji.200939262
- 398 16. Trakala M, Arias CF, García MI, Moreno-Ortiz MC, Tsilingiri K, Fernández PJ, Mellado M,  
399 Díaz-Meco MT, Moscat J, Serrano M, et al. Regulation of macrophage activation and septic  
400 shock susceptibility via p21(WAF1/CIP1). *Eur J Immunol* (2009) **39**:810–819.  
401 doi:10.1002/eji.200838676
- 402 17. Scatizzi JC, Mavers M, Hutcheson J, Young B, Shi B, Pope RM, Ruderman EM, Samways  
403 DSK, Corbett JA, Egan TM, et al. The CDK domain of p21 is a suppressor of IL-1 $\beta$ -mediated  
404 inflammation in activated macrophages. *Eur J Immunol* (2009) **39**:820–825.  
405 doi:10.1002/eji.200838683
- 406 18. Zhang J, Scadden DT, Crumpacker CS. Primitive hematopoietic cells resist HIV-1 infection  
407 via p21. *J Clin Invest* (2007) **117**:473–81. doi:10.1172/JCI28971
- 408 19. Bergamaschi A, David A, Le Rouzic E, Nisole S, Barre-Sinoussi F, Pancino G. The CDK  
409 Inhibitor p21Cip1/WAF1 Is Induced by Fc R Activation and Restricts the Replication of  
410 Human Immunodeficiency Virus Type 1 and Related Primate Lentiviruses in Human  
411 Macrophages. *J Virol* (2009) **83**:12253–12265. doi:10.1128/JVI.01395-09
- 412 20. Valle-Casuso JC, Allouch A, David A, Lenzi GM, Studdard L, Barré-Sinoussi F, Müller-  
413 Trutwin M, Kim B, Pancino G, Sáez-Cirión A. p21 Restricts HIV-1 in Monocyte-Derived  
414 Dendritic Cells through the Reduction of Deoxynucleoside Triphosphate Biosynthesis and  
415 Regulation of SAMHD1 Antiviral Activity. *J Virol* (2017) **91**:1–18. doi:10.1128/JVI.01324-17
- 416 21. Chen H, Li C, Huang J, Cung T, Seiss K, Beamon J, Carrington MF, Porter LC, Burke PS,  
417 Yang Y, et al. CD4+ T cells from elite controllers resist HIV-1 infection by selective  
418 upregulation of p21. *J Clin Invest* (2011) **121**:1549–1560. doi:10.1172/JCI44539
- 419 22. Elahi S, Weiss RH, Merani S. Atorvastatin restricts HIV replication in CD4+ T cells by  
420 upregulation of p21. *Aids* (2016) **30**:171–183. doi:10.1097/QAD.0000000000000917

- 421 23. Elahi S, Niki T, Hirashima M, Horton H. Galectin-9 binding to Tim-3 renders activated human  
422 CD4+ T cells less susceptible to HIV-1 infection. *Blood* (2012) **119**:4192–4204.  
423 doi:10.1182/blood-2011-11-389585
- 424 24. Saez-Cirion A, Hamimi C, Bergamaschi A, David A, Versmisse P, Melard A, Boufassa F,  
425 Barre-Sinoussi F, Lambotte O, Rouzioux C, et al. Restriction of HIV-1 replication in  
426 macrophages and CD4+ T cells from HIV controllers. *Blood* (2011) **118**:955–964.  
427 doi:10.1182/blood-2010-12-327106
- 428 25. Moosa Y, Tanko RF, Ramsuran V, Singh R, Madzivhandila M, Yende-Zuma N, Abrahams  
429 MR, Selhorst P, Gounder K, Moore PL, et al. Case report: Mechanisms of HIV elite control in  
430 two African women. *BMC Infect Dis* (2018) **18**:1–7. doi:10.1186/s12879-018-2961-8
- 431 26. Madlala P, Van de Velde P, Van Remoortel B, Vets S, Van Wijngaerden E, Van Laethem K,  
432 Gijssbers R, Schrijvers R, Debyser Z. Analysis of ex vivo HIV-1 infection in a controller-  
433 discordant couple. *J virus Erad* (2018) **4**:170–173.
- 434 27. Fu M, Blackshear PJ. RNA-binding proteins in immune regulation: a focus on CCCH zinc  
435 finger proteins. *Nat Rev Immunol* (2017) **17**:130–143. doi:10.1038/nri.2016.129
- 436 28. Liu S, Qiu C, Miao R, Zhou J, Lee A, Liu B, Lester SN, Fu W, Zhu L, Zhang L, et al. MCPIP1  
437 restricts HIV infection and is rapidly degraded in activated CD4+ T cells. *Proc Natl Acad Sci*  
438 *U S A* (2013) **110**:19083–8. doi:10.1073/pnas.1316208110
- 439 29. Uehata T, Iwasaki H, Vandenbon A, Matsushita K, Hernandez-cuellar E, Kuniyoshi K, Satoh  
440 T, Mino T, Suzuki Y, Standley DM, et al. Malt1-Induced Cleavage of Regnase-1 in CD4 +  
441 Helper T Cells Regulates Immune Activation. *Cell* (2013) **153**:1036–1049.  
442 doi:10.1016/j.cell.2013.04.034
- 443 30. Jeltsch KM, Hu D, Brenner S, Zöller J, Heinz GA, Nagel D, Vogel KU, Rehage N, Warth SC,  
444 Edelmann SL, et al. Cleavage of roquin and regnase-1 by the paracaspase MALT1 releases  
445 their cooperatively repressed targets to promote TH17 differentiation. *Nat Immunol* (2014)  
446 **15**:1079–1089. doi:10.1038/ni.3008
- 447 31. Jura J, Skalniak L, Koj A. Monocyte chemoattractant protein-1-induced protein-1 (MCPIP1) is a  
448 novel multifunctional modulator of inflammatory reactions. *Biochim Biophys Acta* (2012)  
449 **1823**:1905–13. doi:10.1016/j.bbamcr.2012.06.029
- 450 32. Lichawska-Cieslar A, Pietrzycka R, Ligeza J, Kulecka M, Paziewska A, Kalita A, Dolicka  
451 DD, Wilamowski M, Miekus K, Ostrowski J, et al. RNA sequencing reveals widespread  
452 transcriptome changes in a renal carcinoma cell line. *Oncotarget* (2018) **9**:8597–8613.  
453 doi:10.18632/oncotarget.24269
- 454 33. Azevedo SSD, Caetano DG, Côrtes FH, Teixeira SLM, Santos Silva K, Hoagland B,  
455 Grinsztejn B, Veloso VG, Morgado MG, Bello G. Highly divergent patterns of genetic  
456 diversity and evolution in proviral quasispecies from HIV controllers. *Retrovirology* (2017)  
457 **14**:1–13. doi:10.1186/s12977-017-0354-5
- 458 34. Côrtes FH, de Paula HHS, Bello G, Ribeiro-Alves M, de Azevedo SSD, Caetano DG, Teixeira  
459 SLM, Hoagland B, Grinsztejn B, Veloso VG, et al. Plasmatic levels of IL-18, IP-10, and

- 460 activated CD8+T cells are potential biomarkers to identify HIV-1 elite controllers with a true  
461 functional cure profile. *Front Immunol* (2018) **9**:1–11. doi:10.3389/fimmu.2018.01576
- 462 35. Vandesompele J, De Preter K, Pattyn F, Poppe B, Van Roy N, De Paepe A, Speleman F.  
463 Accurate normalization of real-time quantitative RT-PCR data by geometric averaging of  
464 multiple internal control genes. *Genome Biol* (2002) **3**:RESEARCH0034. doi:10.1186/gb-  
465 2002-3-7-research0034
- 466 36. Basso D, Pesarin F, Salmaso L, Solari A. “Nonparametric One-Way ANOVA”, in  
467 *Permutation Tests for Stochastic Ordering and ANOVA* (New York, NY: Springer), 105–132.  
468 doi:10.1007/978-0-387-85956-9\_5
- 469 37. R Core Team. *R: A language and environment for statistical computing.*, org. R Foundation  
470 for Statistical Computing Vienna, Austria. (2018).
- 471 38. Farberov L, Herzig E, Modai S, Isakov O, Hizi A, Shomron N. MicroRNA-mediated  
472 regulation of p21 and TASK1 cellular restriction factors enhances HIV-1 infection. *J Cell Sci*  
473 (2015) **128**:1607–1616. doi:10.1242/jcs.167817
- 474 39. Suzuki HI, Arase M, Matsuyama H, Choi YL, Ueno T, Mano H, Sugimoto K, Miyazono K.  
475 MCPIP1 ribonuclease antagonizes dicer and terminates microRNA biogenesis through  
476 precursor microRNA degradation. *Mol Cell* (2011) **44**:424–436.  
477 doi:10.1016/j.molcel.2011.09.012
- 478 40. Happel C, Ramalingam D, Ziegelbauer JM. Virus-Mediated Alterations in miRNA Factors and  
479 Degradation of Viral miRNAs by MCPIP1. *PLoS Biol* (2016) **14**:e2000998.  
480 doi:10.1371/journal.pbio.2000998
- 481 41. Suzuki HI, Katsura A, Miyazono K. A role of uridylation pathway for blockade of let-7  
482 microRNA biogenesis by Lin28B. *Cancer Sci* (2015) **106**:1174–1181. doi:10.1111/cas.12721
- 483 42. Sedaghat AR, German J, Teslovich TM, Cofrancesco J, Jie CC, Talbot CC, Siliciano RF.  
484 Chronic CD4+ T-Cell Activation and Depletion in Human Immunodeficiency Virus Type 1  
485 Infection: Type I Interferon-Mediated Disruption of T-Cell Dynamics. *J Virol* (2008)  
486 **82**:1870–1883. doi:10.1128/JVI.02228-07
- 487 43. Hycza MD, Kovacs C, Loutfy M, Halpenny R, Heisler L, Yang S, Wilkins O, Ostrowski M,  
488 Der SD. Distinct Transcriptional Profiles in Ex Vivo CD4+ and CD8+ T Cells Are Established  
489 Early in Human Immunodeficiency Virus Type 1 Infection and Are Characterized by a  
490 Chronic Interferon Response as Well as Extensive Transcriptional Changes in CD8+ T Cells. *J*  
491 *Virol* (2007) **81**:3477–3486. doi:10.1128/JVI.01552-06
- 492 44. Rotger M, Dang KK, Fellay J, Heinzen EL, Feng S, Descombes P, Shianna K V., Ge D,  
493 Günthard HF, Goldstein DB, et al. Genome-Wide mRNA Expression Correlates of Viral  
494 Control in CD4+ T-Cells from HIV-1-Infected Individuals. *PLoS Pathog* (2010) **6**:e1000781.  
495 doi:10.1371/journal.ppat.1000781
- 496 45. Hardy GAD, Sieg S, Rodriguez B, Anthony D, Asaad R, Jiang W, Mudd J, Schacker T,  
497 Funderburg NT, Pilch-Cooper HA, et al. Interferon- $\alpha$  Is the Primary Plasma Type-I IFN in  
498 HIV-1 Infection and Correlates with Immune Activation and Disease Markers. *PLoS One*



- 499 (2013) **8**:e56527. doi:10.1371/journal.pone.0056527
- 500 46. Fernandez S, Tanaskovic S, Helbig K, Rajasuriar R, Kramski M, Murray JM, Beard M,  
501 Purcell D, Lewin SR, Price P, et al. CD4+ T-Cell Deficiency in HIV Patients Responding to  
502 Antiretroviral Therapy Is Associated With Increased Expression of Interferon-Stimulated  
503 Genes in CD4+ T Cells. *J Infect Dis* (2011) **204**:1927–1935. doi:10.1093/infdis/jir659
- 504 47. Skalniak L, Mizgalska D, Zarebski A, Wyrzykowska P, Koj A, Jura J. Regulatory feedback  
505 loop between NF- $\kappa$ B and MCP-1-induced protein 1 RNase. *FEBS J* (2009) **276**:5892–5905.  
506 doi:10.1111/j.1742-4658.2009.07273.x
- 507 48. Liang J, Saad Y, Lei T, Wang J, Qi D, Yang Q, Kolattukudy PE, Fu M. MCP-induced protein  
508 1 deubiquitinates TRAF proteins and negatively regulates JNK and NF- $\kappa$ B signaling. *J Exp*  
509 *Med* (2010) **207**:2959–2973. doi:10.1084/jem.20092641
- 510 49. Diamond MS, Farzan M. The broad-spectrum antiviral functions of IFIT and IFITM proteins.  
511 *Nat Rev Immunol* (2013) **13**:46–57. doi:10.1038/nri3344
- 512 50. Buchanan EL, McAlexander MA, Witwer KW. SAMHD1 expression in blood cells of HIV-1  
513 elite suppressors and viraemic progressors. *J Antimicrob Chemother* (2015) **70**:954–956.  
514 doi:<https://doi.org/10.1093/jac/dku428>
- 515 51. Uehata T, Iwasaki H, Vandenbon A, Matsushita K, Hernandez-Cuellar E, Kuniyoshi K, Satoh  
516 T, Mino T, Suzuki Y, Standley DM, et al. Malt1-induced cleavage of regnase-1 in CD4(+)   
517 helper T cells regulates immune activation. *Cell* (2013) **153**:1036–49.  
518 doi:10.1016/j.cell.2013.04.034
- 519 52. Liang J, Song W, Tromp G, Kolattukudy PE, Fu M. Genome-wide survey and expression  
520 profiling of CCCH-zinc finger family reveals a functional module in macrophage activation.  
521 *PLoS One* (2008) **3**: doi:10.1371/journal.pone.0002880
- 522 53. Matsushita K, Takeuchi O, Standley DM, Kumagai Y, Kawagoe T, Miyake T, Satoh T, Kato  
523 H, Tsujimura T, Nakamura H, et al. Zc3h12a is an RNase essential for controlling immune  
524 responses by regulating mRNA decay. *Nature* (2009) **458**:1185–1190.  
525 doi:10.1038/nature07924
- 526 54. Liang J, Wang J, Azfer A, Song W, Tromp G, Kolattukudy PE, Fu M. A novel CCCH-zinc  
527 finger protein family regulates proinflammatory activation of macrophages. *J Biol Chem*  
528 (2008) **283**:6337–46. doi:10.1074/jbc.M707861200
- 529 55. Li M, Cao W, Liu H, Zhang W, Liu X, Cai Z, Guo J, Wang X, Hui Z, Zhang H, et al. MCPIP1  
530 down-regulates IL-2 expression through an ARE-independent pathway. *PLoS One* (2012)  
531 **7**:e49841. doi:10.1371/journal.pone.0049841
- 532 56. Feinberg MW, Cao Z, Wara AK, Lebedeva MA, Senbanerjee S, Jain MK. Kruppel-like factor  
533 4 is a mediator of proinflammatory signaling in macrophages. *J Biol Chem* (2005) **280**:38247–  
534 58. doi:10.1074/jbc.M509378200
- 535 57. Feinberg MW, Wara AK, Cao Z, Lebedeva MA, Rosenbauer F, Iwasaki H, Hirai H, Katz JP,  
536 Haspel RL, Gray S, et al. The Kruppel-like factor KLF4 is a critical regulator of monocyte

- 537 differentiation. *EMBO J* (2007) **26**:4138–48. doi:10.1038/sj.emboj.7601824
- 538 58. Kapoor N, Niu J, Saad Y, Kumar S, Sirakova T, Becerra E, Li X, Kolattukudy PE.  
539 Transcription factors STAT6 and KLF4 implement macrophage polarization via the dual  
540 catalytic powers of MCPIP. *J Immunol* (2015) **194**:6011–23. doi:10.4049/jimmunol.1402797
- 541 59. Yoon HS, Chen X, Yang VW. Kruppel-like factor 4 mediates p53-dependent G1/S cell cycle  
542 arrest in response to DNA damage. *J Biol Chem* (2003) **278**:2101–5.  
543 doi:10.1074/jbc.M211027200
- 544 60. Zhang W, Geiman DE, Shields JM, Dang DT, Mahatan CS, Kaestner KH, Biggs JR, Kraft AS,  
545 Yang VW. The gut-enriched Kruppel-like factor (Kruppel-like factor 4) mediates the  
546 transactivating effect of p53 on the p21(WAF1)/(Cip)1 promoter. *J Biol Chem* (2000)  
547 **275**:18391–18398. doi:10.1074/jbc.C000062200
- 548 61. Garg A, Kaul D, Chauhan N. APOBEC3G governs to ensure cellular oncogenic  
549 transformation. *Blood Cells Mol Dis* (2015) **55**:248–54. doi:10.1016/j.bcmd.2015.07.009
- 550 62. Pauls E, Ruiz A, Riveira-Munoz E, Permanyer M, Badia R, Clotet B, Keppler OT, Ballana E,  
551 Este JA. p21 regulates the HIV-1 restriction factor SAMHD1. *Proc Natl Acad Sci* (2014)  
552 **111**:E1322–E1324. doi:10.1073/pnas.1322059111
- 553 63. Allouch A, David A, Amie SM, Lahouassa H, Chartier L, Margottin-Goguet F, Barre-Sinoussi  
554 F, Kim B, Saez-Cirion A, Pancino G. p21-mediated RNR2 repression restricts HIV-1  
555 replication in macrophages by inhibiting dNTP biosynthesis pathway. *Proc Natl Acad Sci*  
556 (2013) **110**:E3997–E4006. doi:10.1073/pnas.1306719110
- 557 64. Leng J, Ho H-P, Buzon MJ, Pereyra F, Walker BD, Yu XG, Chang EJ, Lichterfeld M. A Cell-  
558 Intrinsic Inhibitor of HIV-1 Reverse Transcription in CD4+ T Cells from Elite Controllers.  
559 *Cell Host Microbe* (2014) **15**:717–728. doi:10.1016/j.chom.2014.05.011
- 560 65. Wang D, de la Fuente C, Deng L, Wang L, Zilberman I, Eadie C, Healey M, Stein D, Denny  
561 T, Harrison LE, et al. Inhibition of Human Immunodeficiency Virus Type 1 Transcription by  
562 Chemical Cyclin-Dependent Kinase Inhibitors. *J Virol* (2001) **75**:7266–7279.  
563 doi:10.1128/JVI.75.16.7266-7279.2001
- 564 66. Kumari N, Iordanskiy S, Kovalskyy D, Breuer D, Niu X, Lin X, Xu M, Gavrilenko K,  
565 Kashanchi F, Dhawan S, et al. Phenyl-1-Pyridin-2yl-Ethanone-Based Iron Chelators Increase  
566 IκB-α Expression, Modulate CDK2 and CDK9 Activities, and Inhibit HIV-1 Transcription.  
567 *Antimicrob Agents Chemother* (2014) **58**:6558–6571. doi:10.1128/AAC.02918-14
- 568 67. Lin R-J, Chien H-L, Lin S-Y, Chang B-L, Yu H-P, Tang W-C, Lin Y-L. MCPIP1 ribonuclease  
569 exhibits broad-spectrum antiviral effects through viral RNA binding and degradation. *Nucleic  
570 Acids Res* (2013) **41**:3314–3326. doi:10.1093/nar/gkt019
- 571 68. Arias CF, Ballesteros-Tato A, Garcia MI, Martin-Caballero J, Flores JM, Martinez-A C,  
572 Balomenos D. p21CIP1/WAF1 Controls Proliferation of Activated/Memory T Cells and  
573 Affects Homeostasis and Memory T Cell Responses. *J Immunol* (2007) **178**:2296–2306.  
574 doi:10.4049/jimmunol.178.4.2296

- 575 69. Li Y, Huang X, Huang S, He H, Lei T, Saaoud F, Yu X-Q, Melnick A, Kumar A, Papasian CJ,  
576 et al. Central role of myeloid MCPIP1 in protecting against LPS-induced inflammation and  
577 lung injury. *Signal Transduct Target Ther* (2017) **2**:17066. doi:10.1038/sigtrans.2017.66
- 578 70. Uehata T, Takeuchi O. Regnase-1 Is an Endoribonuclease Essential for the Maintenance of  
579 Immune Homeostasis. *J Interf Cytokine Res* (2017) **37**:220–229. doi:10.1089/jir.2017.0001
- 580 71. De Pablo A, Bogoi R, Bejarano I, Toro C, Valencia E, Moreno V, Martín-Carbonero L,  
581 Gómez-Hernando C, Rodés B. Short communication: p21/CDKN1A expression shows broad  
582 interindividual diversity in a subset of HIV-1 elite controllers. *AIDS Res Hum Retroviruses*  
583 (2016) **32**:1–5. doi:10.1089/aid.2015.0137
- 584 72. Abdel-Mohsen M, Wang C, Strain MC, Lada SM, Deng X, Cockerham LR, Pilcher CD, Hecht  
585 FM, Liegler T, Richman DD, et al. Select host restriction factors are associated with HIV  
586 persistence during antiretroviral therapy. *AIDS* (2015) **29**:411–20.  
587 doi:10.1097/QAD.0000000000000572
- 588 73. Lin R-J, Chu J-S, Chien H-L, Tseng C-H, Ko P-C, Mei Y-Y, Tang W-C, Kao Y-T, Cheng H-  
589 Y, Liang Y-C, et al. MCPIP1 suppresses hepatitis C virus replication and negatively regulates  
590 virus-induced proinflammatory cytokine responses. *J Immunol* (2014) **193**:4159–68.  
591 doi:10.4049/jimmunol.1400337
- 592
- 593
- 594
- 595

596 **Table 1.** Main clinical and epidemiologic characteristics of individuals of this study.

| Characteristics                    | HIC (n = 21)     |                  | ART-suppressed (n = 8) | HIV-1 negative (n = 10) |
|------------------------------------|------------------|------------------|------------------------|-------------------------|
|                                    | EC (n = 13)      | VC (n = 8)       |                        |                         |
| Sex, no. (%)                       |                  |                  |                        | 598                     |
| Female                             | 10 (77)          | 3 (38)           | 4 (50)                 | 6 (60)                  |
| Male                               | 3 (23)           | 5 (62)           | 4 (50)                 | 4 (40)                  |
| Age (years)*                       | 45 (39-60)       | 43.5 (39-47)     | 47 (38-53)             | 47 (36-51)              |
| Study point                        |                  |                  |                        | 600                     |
| Time since HIV-1 diagnosis (years) | 9 (5.5-15)       | 12.5 (7-16)      | NA                     | -                       |
| CD4 <sup>+</sup> T cell (cells/μl) | 1027 (834-1255)  | 664 (563-1228)   | 889 (678-1097)         | 1043 (784-1581)         |
| Plasma HIV RNA (copies/ml)         | <50              | 641 (327-915)    | <40                    | -                       |
| CD4/CD8 ratio                      | 1.33 (1.24-1.61) | 0.91 (0.67-1.23) | 1.06 (0.73-1.5)        | 1.69 (1.62-2.03)        |

604 \* Age at study point; Interquartile ranges are shown in parenthesis. HIC, HIV controllers; ART, antiretroviral therapy; EC,  
605 elite controllers; VC, viremic controllers. NA, not available.

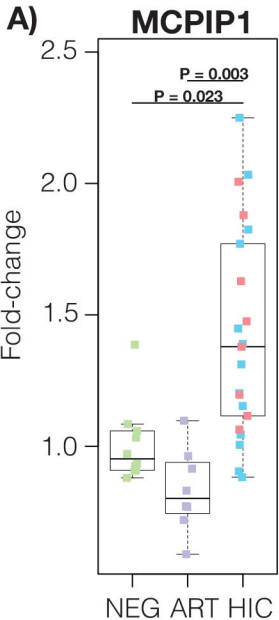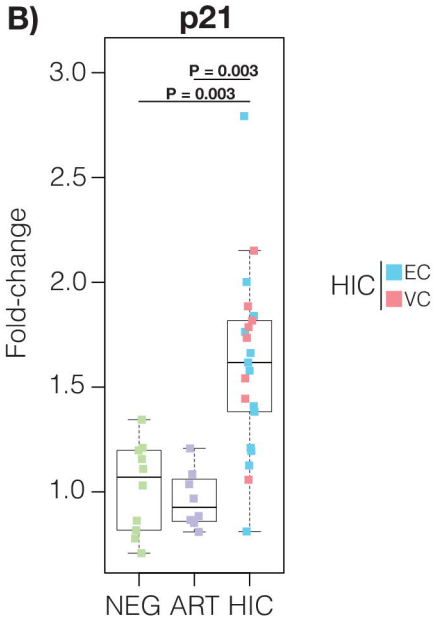



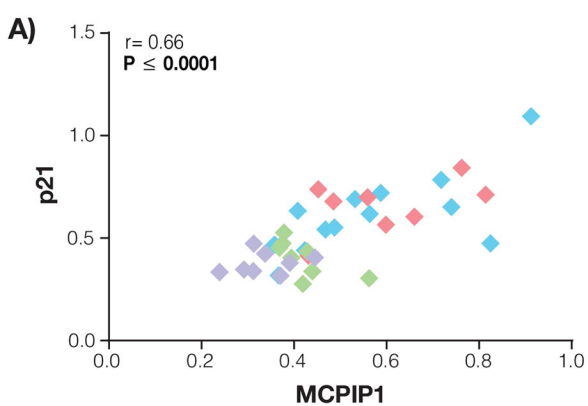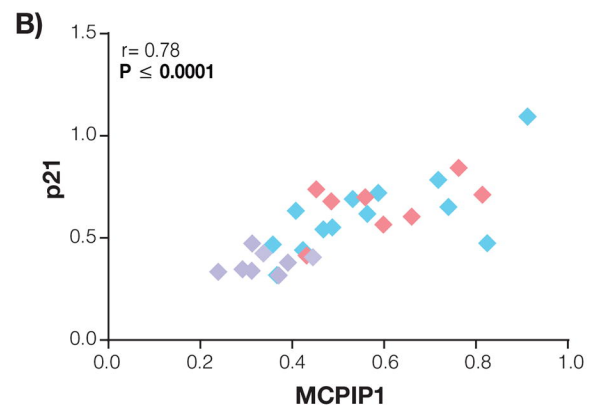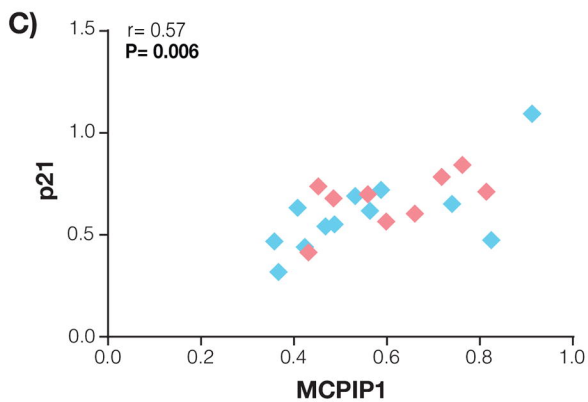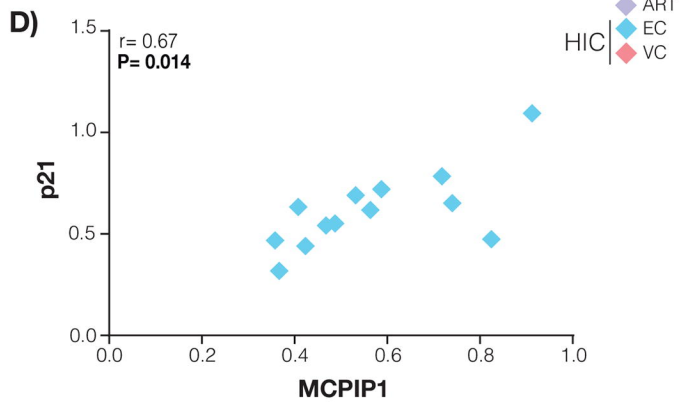

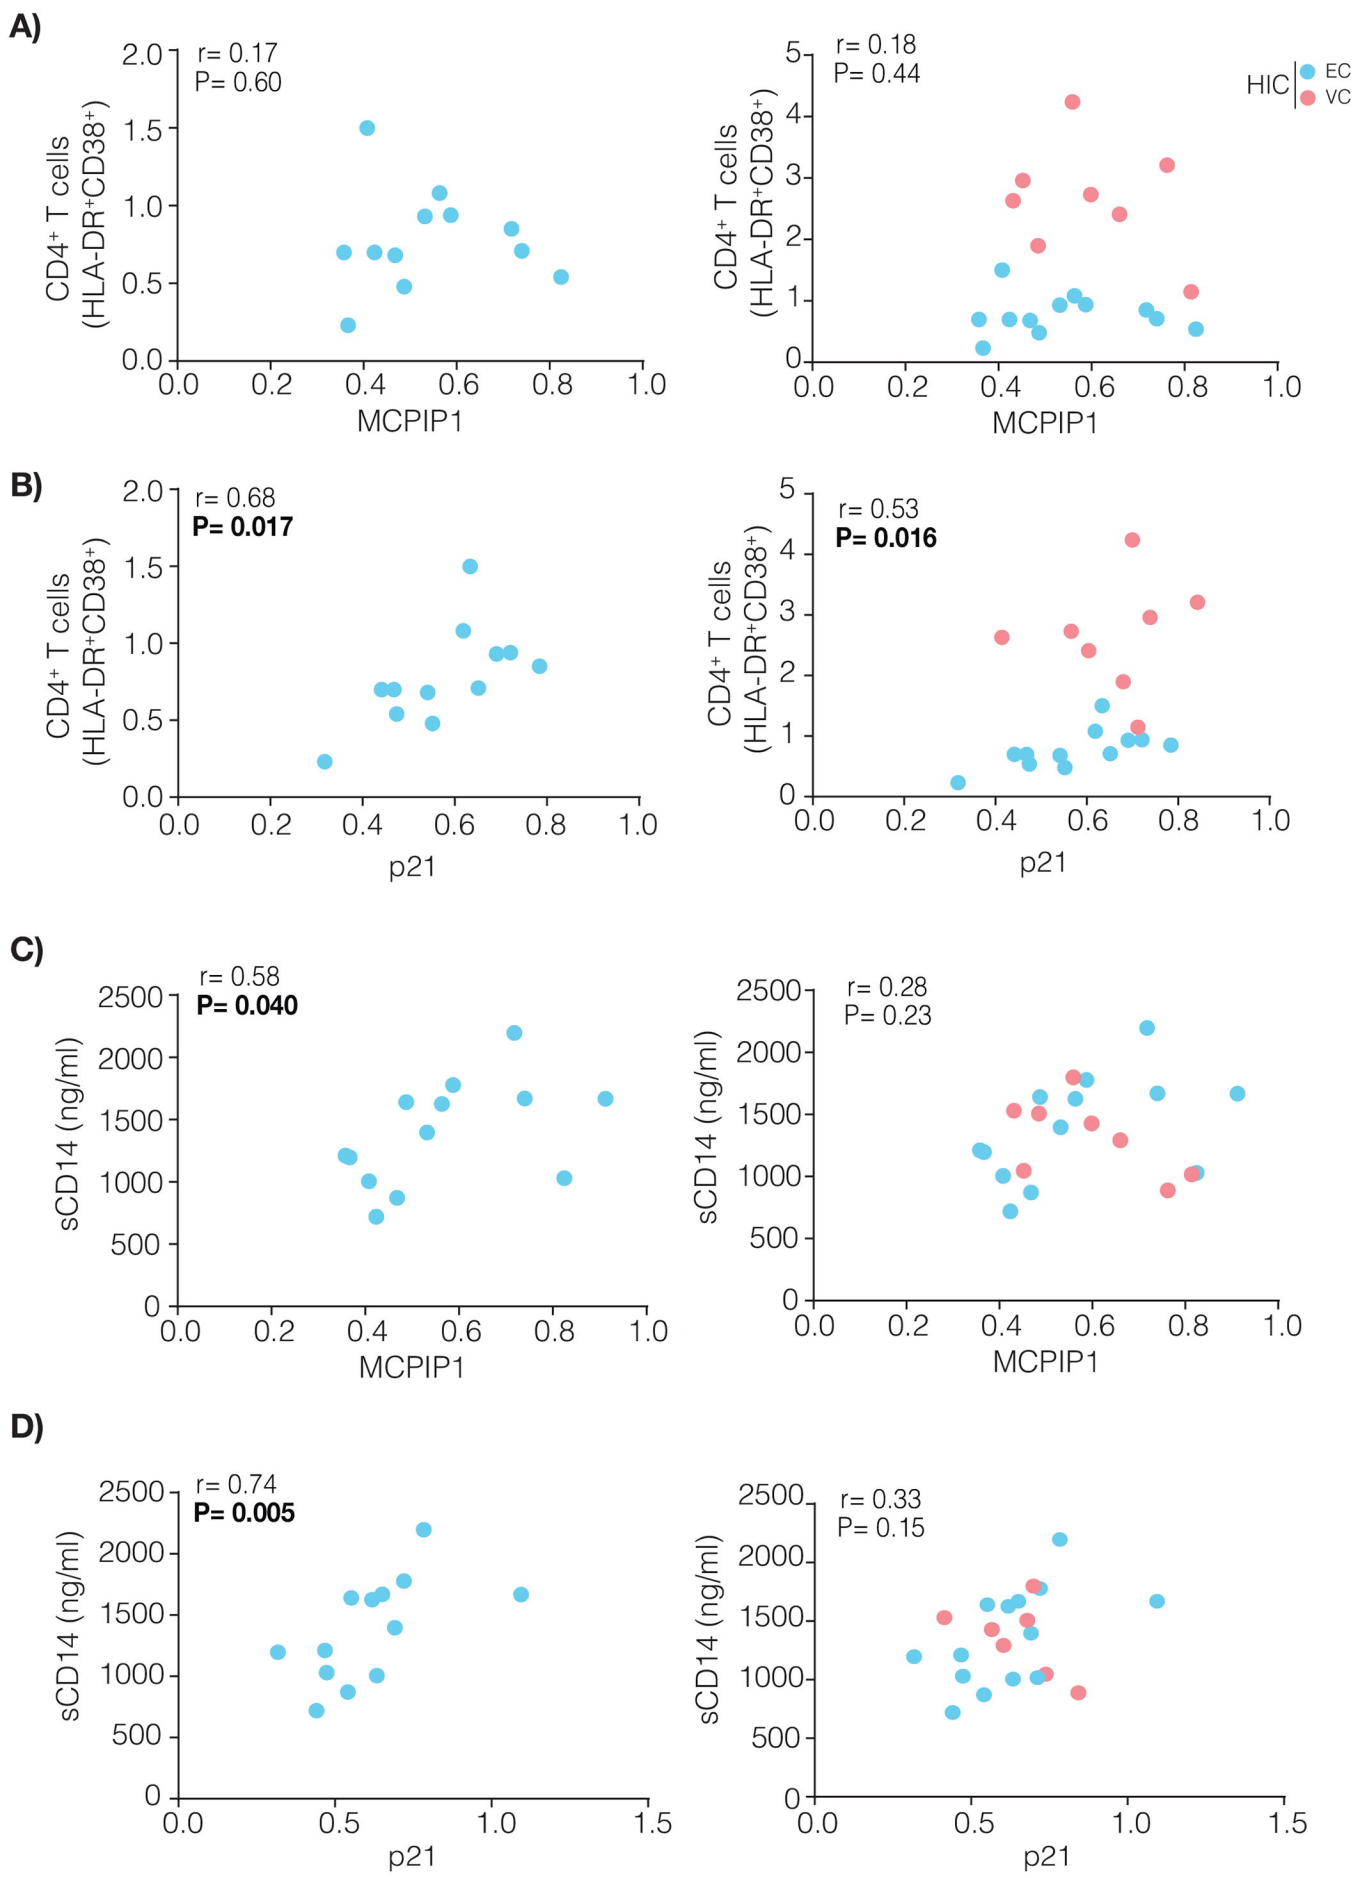

Source: http://biorxiv.org/content/10.1101/611871v2.full.pdf
